# Supplementary material for: An Active Absorbent for Cleanup of High-Concentration Strong Acid and Base Solutions
Source: MDPI journal article supplement (doi:10.3390/ma12203389), 2019-10-17
Supplement: s1 [file s1]

Supporting Information

# An Active Absorbent for Cleanup of High-Concentration Strong Acid and Base Solutions

Nara Han <sup>1</sup>, Sol Park <sup>1</sup>, Byung Kwon Kaang <sup>1</sup>, Wooree Jang <sup>2</sup>, Hye Young Koo <sup>2,\*</sup> and Won San Choi <sup>1,\*</sup>

<sup>1</sup> Department of Chemical and Biological Engineering, Hanbat National University, 125 Dongseodaero, Yuseong-gu, Daejeon 305-719, Korea; xoc123@naver.com (N.H.); thf6363@naver.com (S.P.); rkdqudrnjs3@naver.com (B.K.K.)

<sup>2</sup> Functional Composite Materials Research Center, Korea Institute of Science and Technology (KIST) Jeonbuk Institute of Advanced Composite Materials, 92 Chudong-ro, Bongdong-eup, Wanju-gun, Jeollabuk-do 55324, Korea; 215015@kist.re.kr

\* Correspondence: koohy@kist.re.kr (H.Y.K.); choiws@hanbat.ac.kr (W.S.C.)

## Experimental section

### *Preparation of MFS/Fe<sub>3</sub>O<sub>4</sub>*

FeCl<sub>3</sub>·6H<sub>2</sub>O (0.9 g) and CH<sub>3</sub>COONa (2.4 g) were dissolved in ethylene glycol (30 mL) under vigorous stirring for 5 min at room temperature. The resulting solution was transferred to a Teflon-lined autoclave bomb and heated in an oven at 200 °C for 8 h. The final product was washed 3 times with ethanol and DI water. A mixture containing EtOH (100 mL) and MNPs (200 mg) was stirred for 1 min. Then, an MFS (2 × 2 × 2 cm<sup>3</sup>) was added to the mixture, followed by ultrasonication for 10 min. After 10 min, the resulting sponge was dried in an oven at 50 °C without washing. The resulting MFS/MNP was washed 3 times with DI water and dried in an oven at 50 °C.

### *Preparation of MFS/Au or Ag*

Gold(III) chloride trihydrate or silver(I) nitrate (0.066 g) was dissolved in EtOH (17 mL) under vigorous stirring for 5 min at room temperature. Then, an MFS (2 × 2 × 2 cm<sup>3</sup>) was added to the resulting solution, followed by stirring for 4 h. After 4 h, the resulting sponge was washed 3 times with DI water. The resulting sponge was dipped in NaBH<sub>4</sub> (10 mM) solution for 30 min, washed 3 times with DI water, and dried in an oven at 50 °C.

### *Preparation of MFS/TiO<sub>2</sub>*

Titanium tertbutoxide (7.1 mL) was dissolved in EtOH (50 mL) under vigorous stirring for 1 min at room temperature. Then, 1 mL of DI water was added to the solution, which was stirred for 30 min, and 0.5 mL of HCl solution (pH=3) was added to the resulting solution. An MFS (2 × 2 × 2 cm<sup>3</sup>) was added to the resulting solution, followed by stirring for 4 h. After 4 h, the resulting sponge was washed 3 times with DI water and dried in an oven at 50 °C.

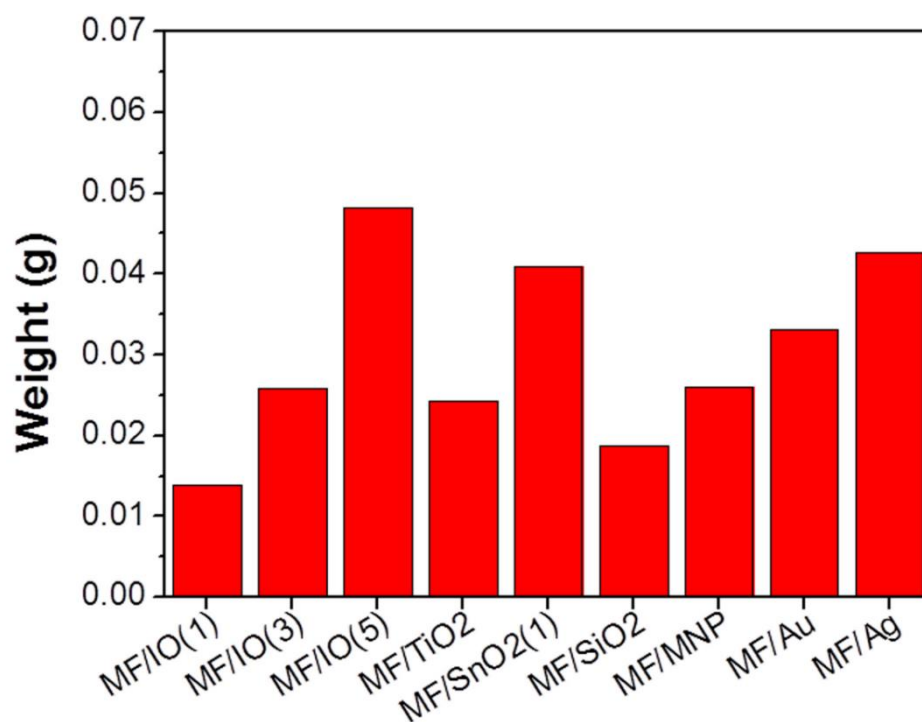

**Figure S1.** Weight data of various absorbents. All absorbents had a same dimensional size and volume. The measurements were repeated three times and average values were used.

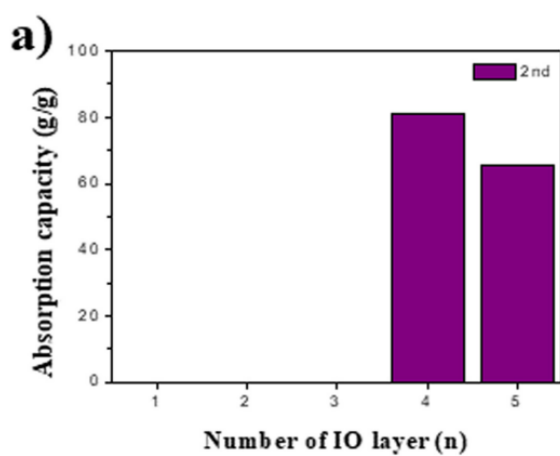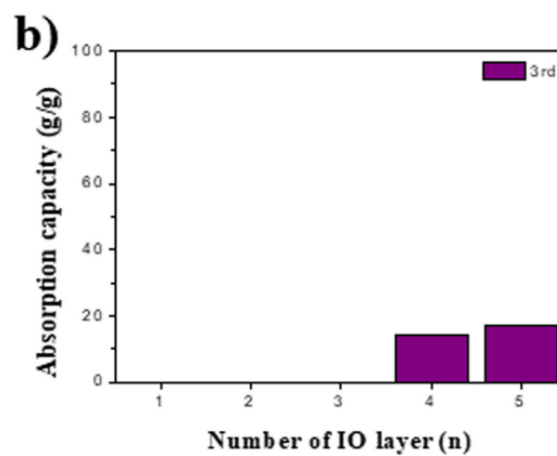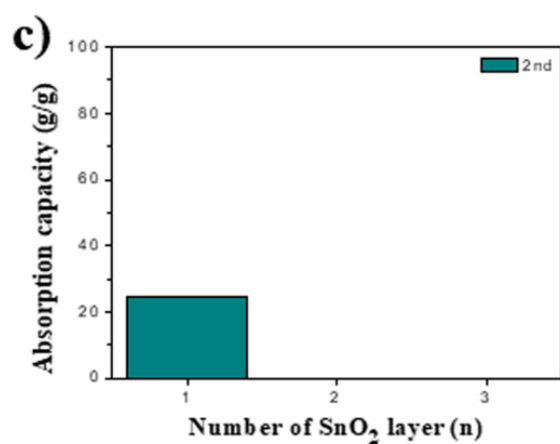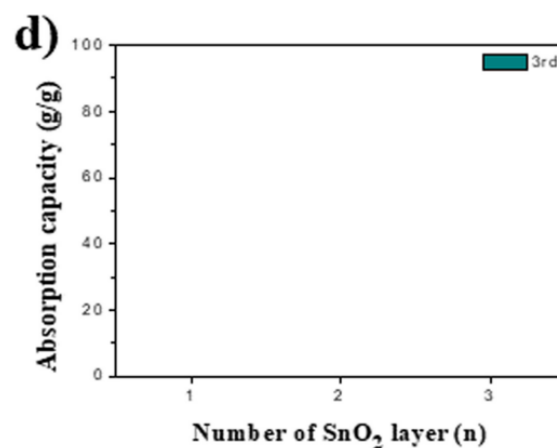

**Figure S2.** Recyclability test of (a,b) MFS/IO(1–5) and (c,d) MFS/SnO<sub>2</sub>(1–3) for (a,c) 2nd and (b,d) 3rd use for the absorption of a NaOH solution (50%).

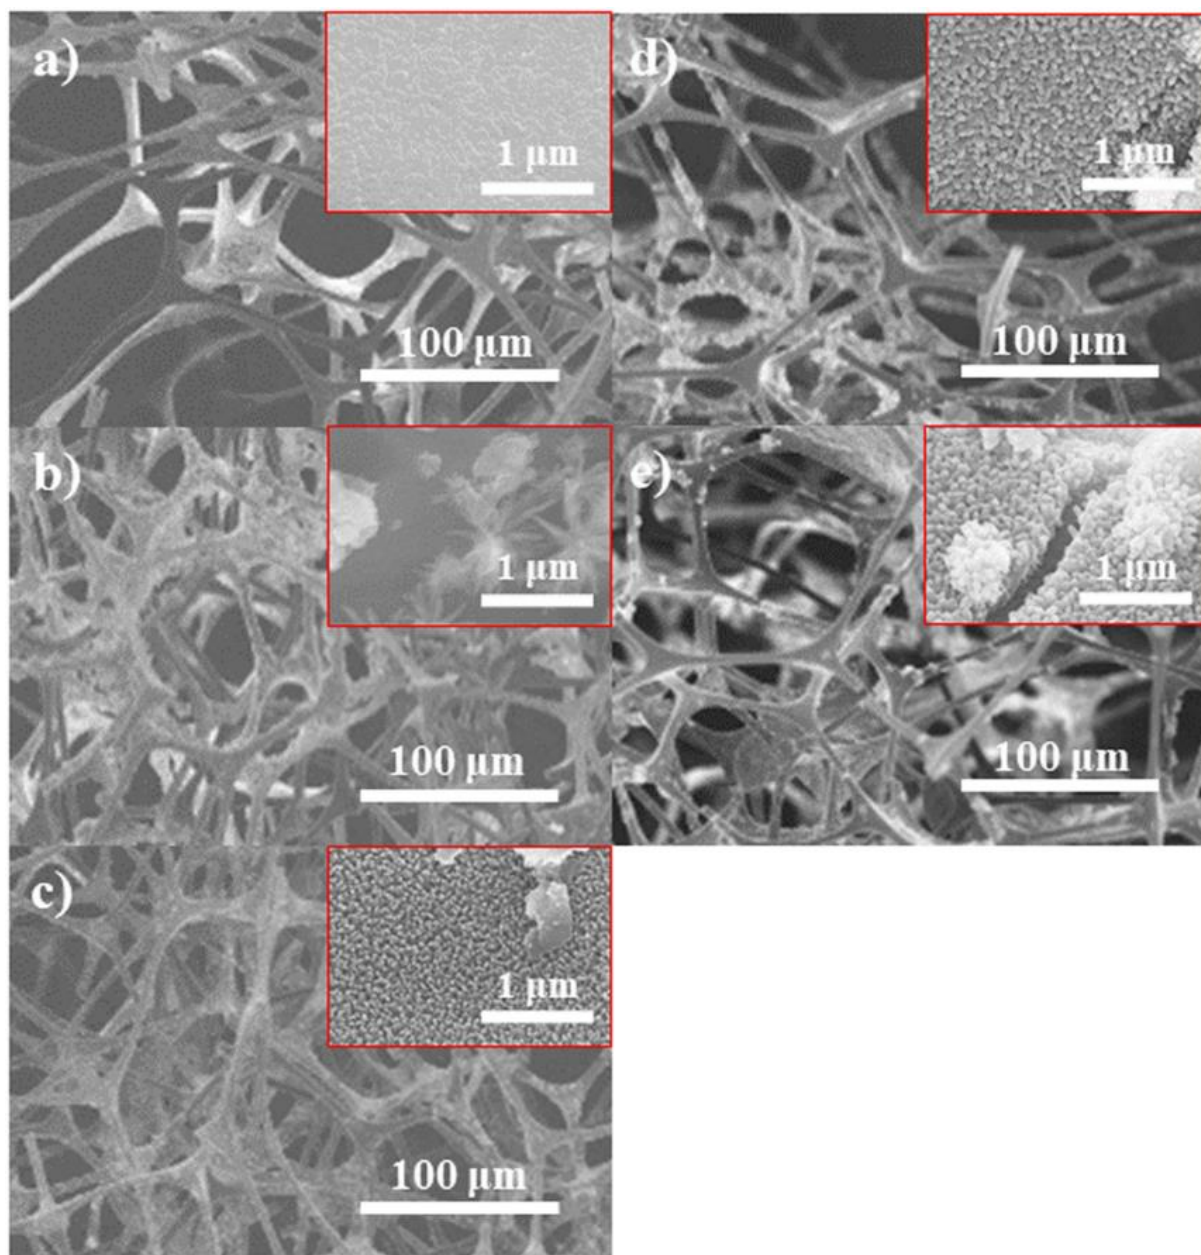

**Figure S3.** SEM images of MFS/IO(1–5) after the 1st absorption of a NaOH solution (50%). (a) MFS/IO(1), (b) MFS/IO(2), (c) MFS/IO(3), (d) MFS/IO(4), and (e) MFS/IO(5).

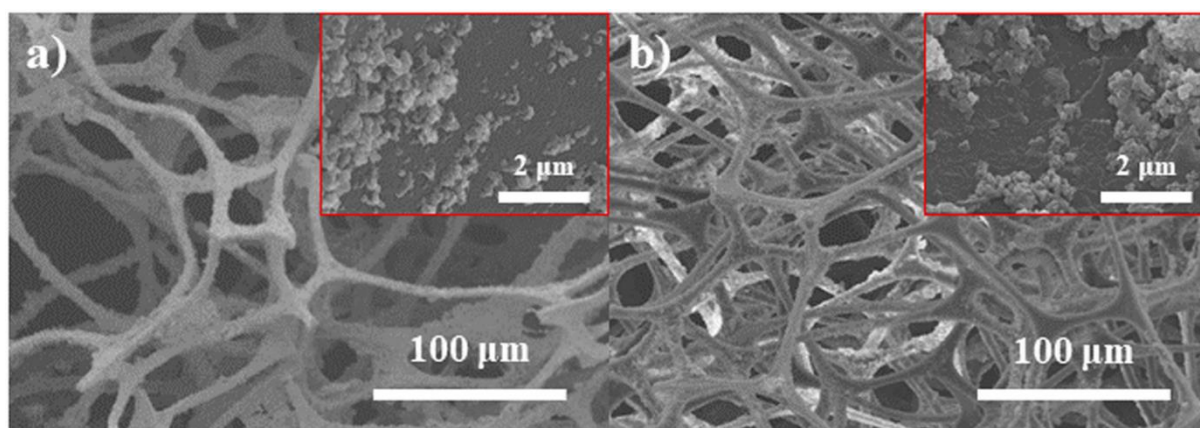

**Figure S4.** SEM images of MFS/Fe<sub>3</sub>O<sub>4</sub> (a) before and (b) after dropping MFS/Fe<sub>3</sub>O<sub>4</sub> on a NaOH solution (50%).

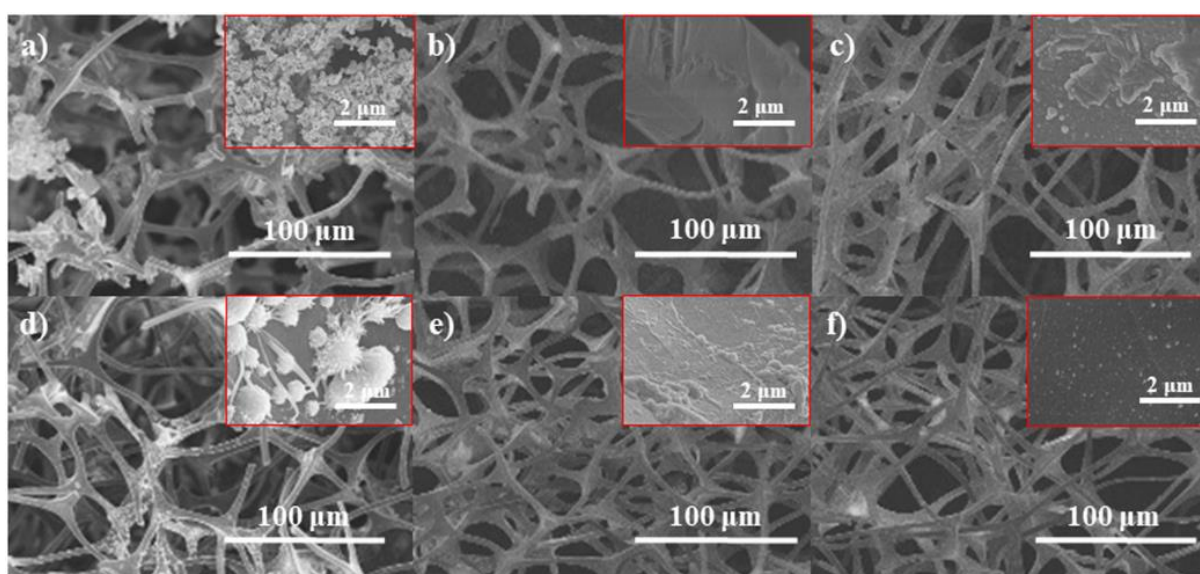

**Figure S5.** SEM images of MFS/SnO<sub>2</sub> (a–c) before and (d–f) after the 1st absorption cycle of a NaOH solution (50%). (a,d) MFS/SnO<sub>2</sub>(1), (b,e) MFS/SnO<sub>2</sub>(2), and (c,f) MFS/SnO<sub>2</sub>(3).



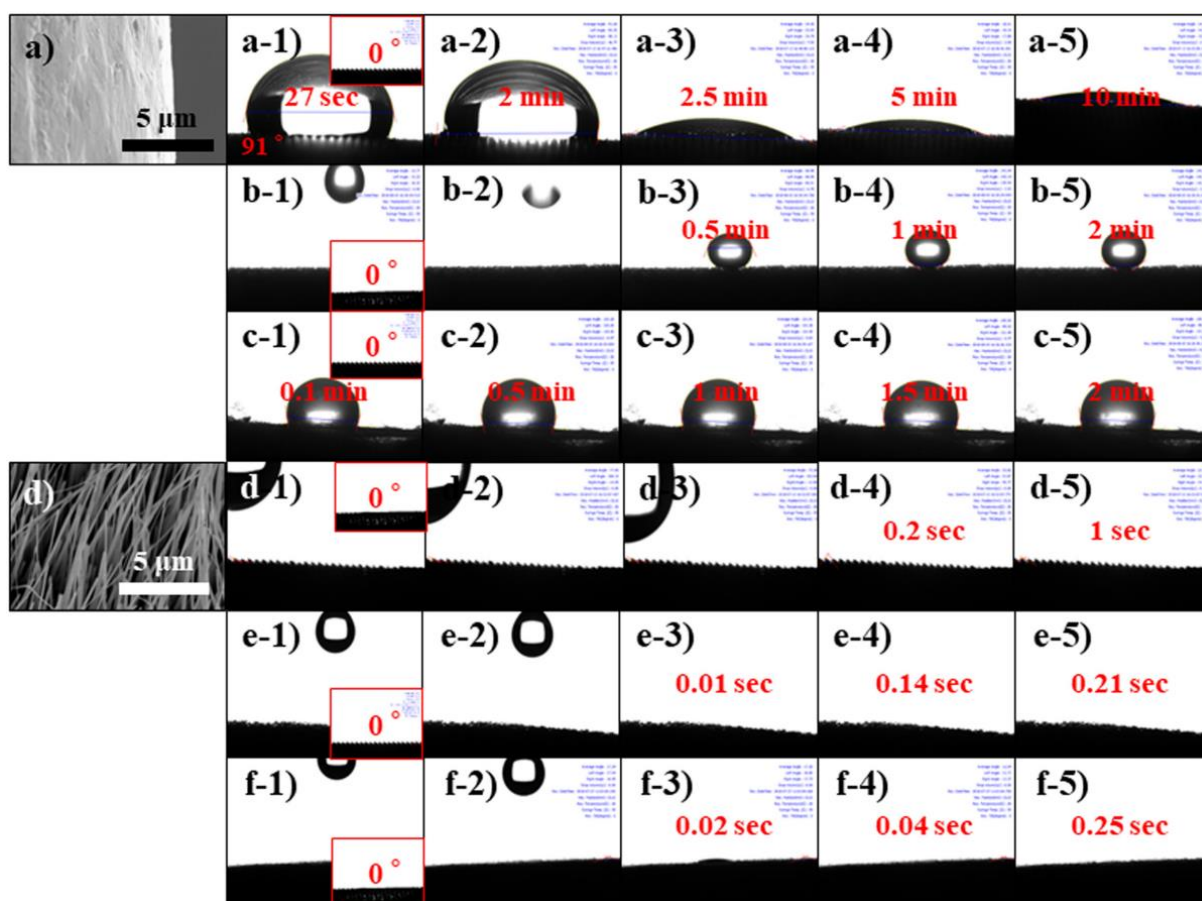

**Figure S6.** Contact angle and absorption time data of a droplet of 50% NaOH solution upon dropping a droplet on various absorbents or substrates. (a1–a5) Superhydrophilic Cu mesh with a smooth surface and (a) its SEM image, (b1–b5) MFS, (c1–c5) absorption pad, (d1–d5) superhydrophilic Cu mesh with a needlelike surface and (d) its SEM image, (e1–e5) MFS/IO(1), and (f1–f5) MFS/IO(5). Each inset shows the WCA of each absorbent or substrate.

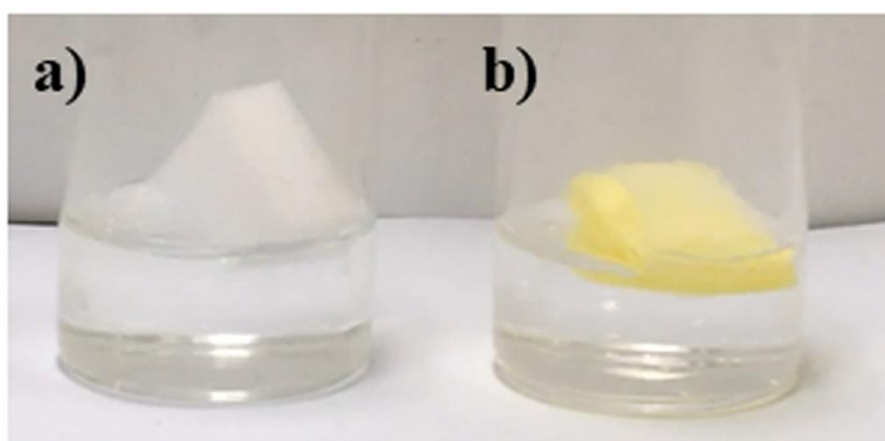

**Figure S7.** Drop tests of absorbents on a HCl solution (15%). (a) MFS and (b) absorption pad.

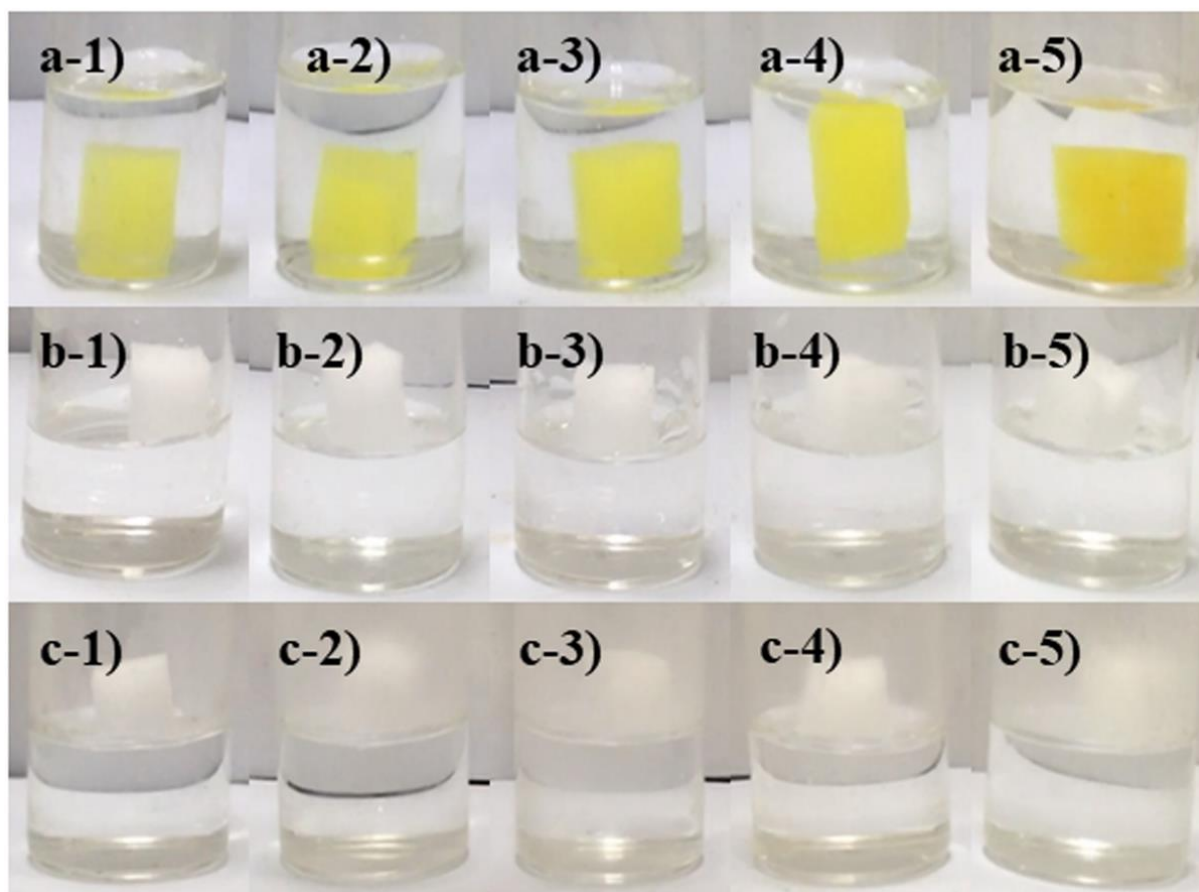

**Figure S8.** Recyclability test of MFS/IO(1–5) for absorption of a HCl solution (15%). (a1–a5) 1st absorption, (b1–b5) 2nd absorption, and (c1–c5) 3rd absorption cycle. (a1,b1,c1) MFS/IO(1), (a2,b2,c2) MFS/IO(2), (a3,b3,c3) MFS/IO(3), (a4,b4,c4) MFS/IO(4), and (a5,b5,c5) MFS/IO(5).
